# Supplementary material
Source: PubMed Central journal article supplement (PMC7640738)
Supplement: mr0c00010_si_001.pdf [file mr0c00010_si_001.pdf]

## Supporting information

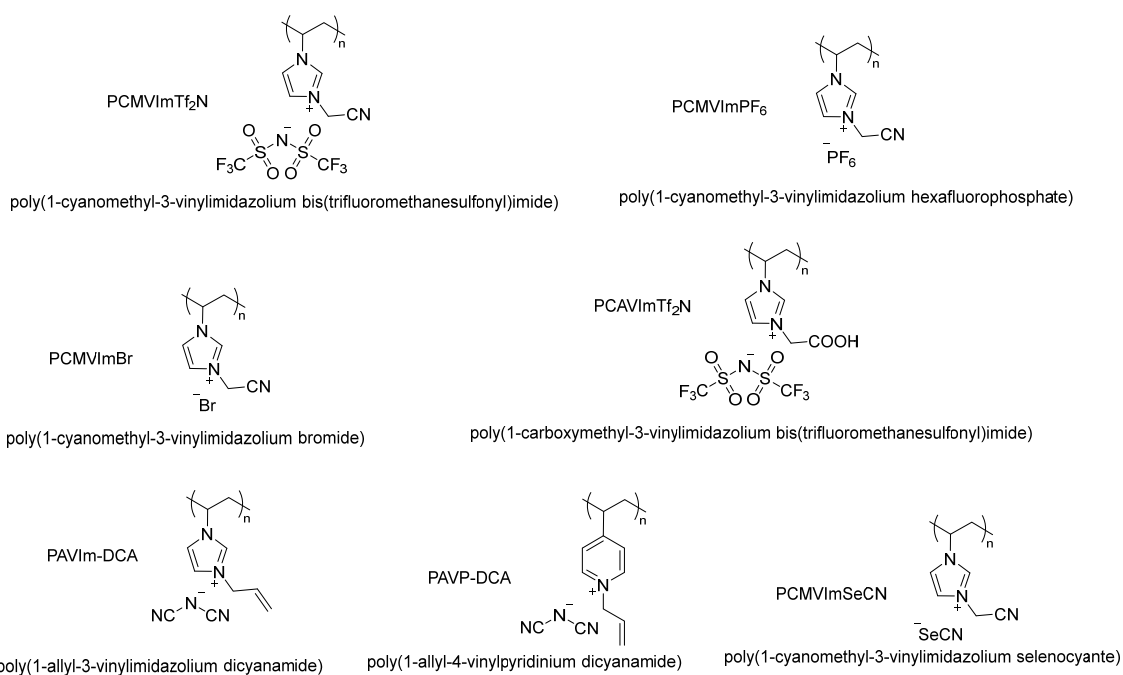

**Figure S1.** Structural information of PILs used for heteroatom doped porous carbon membranes.

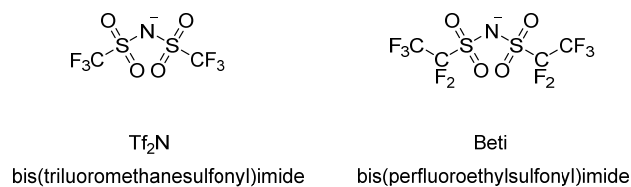

**Figure S2.** Chemical structures of the two anions Tf<sub>2</sub>N and Beti.

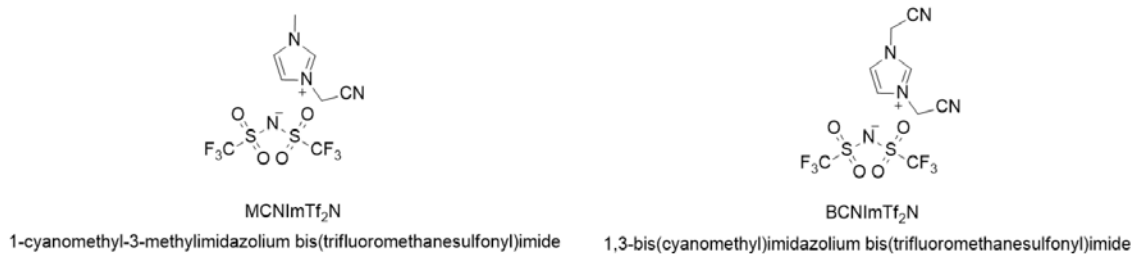

**Figure S3.** Chemical structures of ILs used for the construction of micro/mesoporosity.
